# Supplementary material
Source: ML conference proceedings conference paper supplement (https://proceedings.neurips.cc/paper_files/paper/2022/hash/3066f60a91d652f4dc690637ac3a2f8c-Abstract.html)
Supplement: Supplementary file 1 [file 3066f60a91d652f4dc690637ac3a2f8c-Supplemental-Conference.zip]

Archive with 128 entries (105 files):
- nips_hvae_Supplementary Material/nips_ood_appendix_1_11.pdf
- nips_hvae_Supplementary Material/nips_ood_main+appendix.pdf
- nips_hvae_Supplementary Material/nips22_hvae_ood_code/
- nips_hvae_Supplementary Material/nips22_hvae_ood_code/.idea/
- nips_hvae_Supplementary Material/nips22_hvae_ood_code/.idea/.gitignore
- nips_hvae_Supplementary Material/nips22_hvae_ood_code/.idea/deployment.xml
- nips_hvae_Supplementary Material/nips22_hvae_ood_code/.idea/inspectionProfiles/
- nips_hvae_Supplementary Material/nips22_hvae_ood_code/.idea/inspectionProfiles/profiles_settings.xml
- nips_hvae_Supplementary Material/nips22_hvae_ood_code/.idea/inspectionProfiles/Project_Default.xml
- nips_hvae_Supplementary Material/nips22_hvae_ood_code/.idea/misc.xml
- nips_hvae_Supplementary Material/nips22_hvae_ood_code/.idea/modules.xml
- nips_hvae_Supplementary Material/nips22_hvae_ood_code/.idea/nips22_hvae_ood_code.iml
- nips_hvae_Supplementary Material/nips22_hvae_ood_code/.idea/workspace.xml
- nips_hvae_Supplementary Material/nips22_hvae_ood_code/oodd/
- nips_hvae_Supplementary Material/nips22_hvae_ood_code/oodd/__init__.py
- nips_hvae_Supplementary Material/nips22_hvae_ood_code/oodd/__pycache__/
- nips_hvae_Supplementary Material/nips22_hvae_ood_code/oodd/__pycache__/__init__.cpython-37.pyc
- nips_hvae_Supplementary Material/nips22_hvae_ood_code/oodd/__pycache__/constants.cpython-37.pyc
- nips_hvae_Supplementary Material/nips22_hvae_ood_code/oodd/__pycache__/losses.cpython-37.pyc
- nips_hvae_Supplementary Material/nips22_hvae_ood_code/oodd/constants.py
- nips_hvae_Supplementary Material/nips22_hvae_ood_code/oodd/datasets/
- nips_hvae_Supplementary Material/nips22_hvae_ood_code/oodd/datasets/__init__.py
- nips_hvae_Supplementary Material/nips22_hvae_ood_code/oodd/datasets/__pycache__/
- nips_hvae_Supplementary Material/nips22_hvae_ood_code/oodd/datasets/__pycache__/__init__.cpython-37.pyc
- nips_hvae_Supplementary Material/nips22_hvae_ood_code/oodd/datasets/__pycache__/data_module.cpython-37.pyc
- nips_hvae_Supplementary Material/nips22_hvae_ood_code/oodd/datasets/__pycache__/dataset_base.cpython-37.pyc
- nips_hvae_Supplementary Material/nips22_hvae_ood_code/oodd/datasets/__pycache__/not_mnist.cpython-37.pyc
- nips_hvae_Supplementary Material/nips22_hvae_ood_code/oodd/datasets/__pycache__/omniglot.cpython-37.pyc
- nips_hvae_Supplementary Material/nips22_hvae_ood_code/oodd/datasets/__pycache__/small_norb.cpython-37.pyc
- nips_hvae_Supplementary Material/nips22_hvae_ood_code/oodd/datasets/__pycache__/torchvision_datasets.cpython-37.pyc
- nips_hvae_Supplementary Material/nips22_hvae_ood_code/oodd/datasets/__pycache__/transforms.cpython-37.pyc
- nips_hvae_Supplementary Material/nips22_hvae_ood_code/oodd/datasets/data_module.py
- nips_hvae_Supplementary Material/nips22_hvae_ood_code/oodd/datasets/dataset_base.py
- nips_hvae_Supplementary Material/nips22_hvae_ood_code/oodd/datasets/not_mnist.py
- nips_hvae_Supplementary Material/nips22_hvae_ood_code/oodd/datasets/omniglot.py
- nips_hvae_Supplementary Material/nips22_hvae_ood_code/oodd/datasets/small_norb.py
- nips_hvae_Supplementary Material/nips22_hvae_ood_code/oodd/datasets/torchvision_datasets.py
- nips_hvae_Supplementary Material/nips22_hvae_ood_code/oodd/datasets/transforms.py
- nips_hvae_Supplementary Material/nips22_hvae_ood_code/oodd/evaluators/
- nips_hvae_Supplementary Material/nips22_hvae_ood_code/oodd/evaluators/__init__.py
- nips_hvae_Supplementary Material/nips22_hvae_ood_code/oodd/evaluators/__pycache__/
- nips_hvae_Supplementary Material/nips22_hvae_ood_code/oodd/evaluators/__pycache__/__init__.cpython-37.pyc
- nips_hvae_Supplementary Material/nips22_hvae_ood_code/oodd/evaluators/__pycache__/evaluator.cpython-37.pyc
- nips_hvae_Supplementary Material/nips22_hvae_ood_code/oodd/evaluators/evaluator.py
- nips_hvae_Supplementary Material/nips22_hvae_ood_code/oodd/layers/
- nips_hvae_Supplementary Material/nips22_hvae_ood_code/oodd/layers/__init__.py
- nips_hvae_Supplementary Material/nips22_hvae_ood_code/oodd/layers/__pycache__/
- nips_hvae_Supplementary Material/nips22_hvae_ood_code/oodd/layers/__pycache__/__init__.cpython-37.pyc
- nips_hvae_Supplementary Material/nips22_hvae_ood_code/oodd/layers/__pycache__/activations.cpython-37.pyc
- nips_hvae_Supplementary Material/nips22_hvae_ood_code/oodd/layers/__pycache__/convolutions.cpython-37.pyc
- nips_hvae_Supplementary Material/nips22_hvae_ood_code/oodd/layers/__pycache__/likelihoods.cpython-37.pyc
- nips_hvae_Supplementary Material/nips22_hvae_ood_code/oodd/layers/__pycache__/linear.cpython-37.pyc
- nips_hvae_Supplementary Material/nips22_hvae_ood_code/oodd/layers/__pycache__/stages.cpython-37.pyc
- nips_hvae_Supplementary Material/nips22_hvae_ood_code/oodd/layers/__pycache__/stochastic.cpython-37.pyc
- nips_hvae_Supplementary Material/nips22_hvae_ood_code/oodd/layers/activations.py
- nips_hvae_Supplementary Material/nips22_hvae_ood_code/oodd/layers/convolutions.py
- nips_hvae_Supplementary Material/nips22_hvae_ood_code/oodd/layers/deterministic/
- nips_hvae_Supplementary Material/nips22_hvae_ood_code/oodd/layers/deterministic/__init__.py
- nips_hvae_Supplementary Material/nips22_hvae_ood_code/oodd/layers/deterministic/__pycache__/
- nips_hvae_Supplementary Material/nips22_hvae_ood_code/oodd/layers/deterministic/__pycache__/__init__.cpython-37.pyc
- nips_hvae_Supplementary Material/nips22_hvae_ood_code/oodd/layers/deterministic/__pycache__/base_module.cpython-37.pyc
- nips_hvae_Supplementary Material/nips22_hvae_ood_code/oodd/layers/deterministic/__pycache__/deterministic_modules.cpython-37.pyc
- nips_hvae_Supplementary Material/nips22_hvae_ood_code/oodd/layers/deterministic/__pycache__/residual.cpython-37.pyc
- nips_hvae_Supplementary Material/nips22_hvae_ood_code/oodd/layers/deterministic/base_module.py
- nips_hvae_Supplementary Material/nips22_hvae_ood_code/oodd/layers/deterministic/deterministic_modules.py
- nips_hvae_Supplementary Material/nips22_hvae_ood_code/oodd/layers/deterministic/residual.py
- nips_hvae_Supplementary Material/nips22_hvae_ood_code/oodd/layers/likelihoods.py
- nips_hvae_Supplementary Material/nips22_hvae_ood_code/oodd/layers/linear.py
- nips_hvae_Supplementary Material/nips22_hvae_ood_code/oodd/layers/stages.py
- nips_hvae_Supplementary Material/nips22_hvae_ood_code/oodd/layers/stochastic.py
- nips_hvae_Supplementary Material/nips22_hvae_ood_code/oodd/losses.py
- nips_hvae_Supplementary Material/nips22_hvae_ood_code/oodd/models/
- nips_hvae_Supplementary Material/nips22_hvae_ood_code/oodd/models/__init__.py
- nips_hvae_Supplementary Material/nips22_hvae_ood_code/oodd/models/__pycache__/
- nips_hvae_Supplementary Material/nips22_hvae_ood_code/oodd/models/__pycache__/__init__.cpython-37.pyc
- nips_hvae_Supplementary Material/nips22_hvae_ood_code/oodd/models/__pycache__/base_module.cpython-37.pyc
- nips_hvae_Supplementary Material/nips22_hvae_ood_code/oodd/models/__pycache__/checkpointing.cpython-37.pyc
- nips_hvae_Supplementary Material/nips22_hvae_ood_code/oodd/models/__pycache__/dvae.cpython-37.pyc
- nips_hvae_Supplementary Material/nips22_hvae_ood_code/oodd/models/base_module.py
- nips_hvae_Supplementary Material/nips22_hvae_ood_code/oodd/models/checkpointing.py
- nips_hvae_Supplementary Material/nips22_hvae_ood_code/oodd/models/dvae.py
- nips_hvae_Supplementary Material/nips22_hvae_ood_code/oodd/utils/
- nips_hvae_Supplementary Material/nips22_hvae_ood_code/oodd/utils/__init__.py
- nips_hvae_Supplementary Material/nips22_hvae_ood_code/oodd/utils/__pycache__/
- nips_hvae_Supplementary Material/nips22_hvae_ood_code/oodd/utils/__pycache__/__init__.cpython-37.pyc
- nips_hvae_Supplementary Material/nips22_hvae_ood_code/oodd/utils/__pycache__/argparsing.cpython-37.pyc
- nips_hvae_Supplementary Material/nips22_hvae_ood_code/oodd/utils/__pycache__/device.cpython-37.pyc
- nips_hvae_Supplementary Material/nips22_hvae_ood_code/oodd/utils/__pycache__/files.cpython-37.pyc
- nips_hvae_Supplementary Material/nips22_hvae_ood_code/oodd/utils/__pycache__/init.cpython-37.pyc
- nips_hvae_Supplementary Material/nips22_hvae_ood_code/oodd/utils/__pycache__/operations.cpython-37.pyc
- nips_hvae_Supplementary Material/nips22_hvae_ood_code/oodd/utils/__pycache__/plotting.cpython-37.pyc
- nips_hvae_Supplementary Material/nips22_hvae_ood_code/oodd/utils/__pycache__/rand.cpython-37.pyc
- nips_hvae_Supplementary Material/nips22_hvae_ood_code/oodd/utils/__pycache__/shape.cpython-37.pyc
- nips_hvae_Supplementary Material/nips22_hvae_ood_code/oodd/utils/argparsing.py
- nips_hvae_Supplementary Material/nips22_hvae_ood_code/oodd/utils/device.py
- nips_hvae_Supplementary Material/nips22_hvae_ood_code/oodd/utils/files.py
- nips_hvae_Supplementary Material/nips22_hvae_ood_code/oodd/utils/init.py
- nips_hvae_Supplementary Material/nips22_hvae_ood_code/oodd/utils/operations.py
- nips_hvae_Supplementary Material/nips22_hvae_ood_code/oodd/utils/plotting.py
- nips_hvae_Supplementary Material/nips22_hvae_ood_code/oodd/utils/rand.py
- nips_hvae_Supplementary Material/nips22_hvae_ood_code/oodd/utils/shape.py
- nips_hvae_Supplementary Material/nips22_hvae_ood_code/oodd/utils/test.py
- nips_hvae_Supplementary Material/nips22_hvae_ood_code/oodd/variational/
- nips_hvae_Supplementary Material/nips22_hvae_ood_code/oodd/variational/__init__.py
- nips_hvae_Supplementary Material/nips22_hvae_ood_code/oodd/variational/__pycache__/
- nips_hvae_Supplementary Material/nips22_hvae_ood_code/oodd/variational/__pycache__/__init__.cpython-37.pyc
- nips_hvae_Supplementary Material/nips22_hvae_ood_code/oodd/variational/__pycache__/deterministic_warmup.cpython-37.pyc
- nips_hvae_Supplementary Material/nips22_hvae_ood_code/oodd/variational/__pycache__/free_nats.cpython-37.pyc
- nips_hvae_Supplementary Material/nips22_hvae_ood_code/oodd/variational/__pycache__/utils.cpython-37.pyc
- nips_hvae_Supplementary Material/nips22_hvae_ood_code/oodd/variational/deterministic_warmup.py
- nips_hvae_Supplementary Material/nips22_hvae_ood_code/oodd/variational/free_nats.py
- nips_hvae_Supplementary Material/nips22_hvae_ood_code/oodd/variational/utils.py
- nips_hvae_Supplementary Material/nips22_hvae_ood_code/ReadMe.txt
- nips_hvae_Supplementary Material/nips22_hvae_ood_code/scripts/
- nips_hvae_Supplementary Material/nips22_hvae_ood_code/scripts/dvae_run_cifar.py
- nips_hvae_Supplementary Material/nips22_hvae_ood_code/scripts/dvae_run_fmnist.py
- nips_hvae_Supplementary Material/nips22_hvae_ood_code/scripts/ood-llr.py
- nips_hvae_Supplementary Material/nips22_hvae_ood_code/scripts/ood-llr-results.py
- nips_hvae_Supplementary Material/nips22_hvae_ood_code/scripts/ood-new-metric.py
- nips_hvae_Supplementary Material/nips22_hvae_ood_code/scripts/ood-new-metric-results.py
- nips_hvae_Supplementary Material/nips22_hvae_ood_code/tests/
- nips_hvae_Supplementary Material/nips22_hvae_ood_code/tests/datasets/
- nips_hvae_Supplementary Material/nips22_hvae_ood_code/tests/datasets/test_datamodule.py
- nips_hvae_Supplementary Material/nips22_hvae_ood_code/tests/datasets/test_not_mnist.py
- nips_hvae_Supplementary Material/nips22_hvae_ood_code/tests/datasets/test_torchvision_datasets.py
- nips_hvae_Supplementary Material/nips22_hvae_ood_code/tests/datasets/test_transforms.py
- nips_hvae_Supplementary Material/nips22_hvae_ood_code/tests/layers/
- nips_hvae_Supplementary Material/nips22_hvae_ood_code/tests/layers/test_stochastic.py
