# Supplementary material
Source: ML conference proceedings conference paper supplement (https://proceedings.neurips.cc/paper_files/paper/2022/hash/3066f60a91d652f4dc690637ac3a2f8c-Abstract.html)
Supplement: Supplementary file 1 [file 3066f60a91d652f4dc690637ac3a2f8c-Supplemental-Conference.zip › nips_hvae_Supplementary Material/nips22_hvae_ood_code/oodd/datasets/__init__.py]

from oodd.datasets.data_module import DataModule

from oodd.datasets.dataset_base import BaseDataset

from oodd.datasets.torchvision_datasets import *
from oodd.datasets.omniglot import *
from oodd.datasets.small_norb import *
from oodd.datasets.not_mnist import *
