# Supplementary material
Source: ML conference proceedings conference paper supplement (https://proceedings.neurips.cc/paper_files/paper/2022/hash/3066f60a91d652f4dc690637ac3a2f8c-Abstract.html)
Supplement: Supplementary file 1 [file 3066f60a91d652f4dc690637ac3a2f8c-Supplemental-Conference.zip › nips_hvae_Supplementary Material/nips22_hvae_ood_code/oodd/layers/likelihoods.py]

from collections import namedtuple

import numpy as np
import torch
import torch.nn as nn
import torch.nn.functional as F
import torch.distributions as D

from .activations import get_activation
from .convolutions import NormedSameConv2d
from .linear import NormedDense, NormedLinear


fields = ["likelihood", "samples", "mean", "mode", "variance", "distribution", "distribution_kwargs"]
LikelihoodData = namedtuple(typename="LikelihoodData", field_names=fields, defaults=[torch.empty(0)] * len(fields))


class LikelihoodModule(nn.Module):
    """General module for parameterizing likelihoods.

    Can change the number of channels/features in the input but not the spatial shape, should it have any.
    """

    def __init__(self, input_shape, out_shape, distribution, activation="LeakyReLU"):
        super().__init__()
        self.input_shape = input_shape
        self.out_shape = out_shape
        self.activation = get_activation(activation)()
        self.distribution = distribution

    def get_distribution_kwargs(self, x):
        raise NotImplementedError

    def forward(self, x_p, x=None):
        """
        Forward pass the input to the likelihood transformation, x_p, to obtain x_hat.
        Optionally compute the likelihood of x_hat given the original x.
        """
        x_p = self.activation(x_p)
        distr_kwargs = self.get_distribution_kwargs(x_p)
        distribution = self.distribution(**distr_kwargs)

        if x is None:
            likelihood = None
        else:
            likelihood = self.log_likelihood(distribution, x)

        if distribution.has_rsample:
            samples = distribution.rsample()
        else:
            samples = distribution.sample()

        data = LikelihoodData(
            likelihood=likelihood,
            samples=samples,
            mean=distribution.mean,
            mode=self.mode(distribution),
            variance=distribution.variance,
            distribution=None,
            distribution_kwargs=distr_kwargs,
        )
        return likelihood, data

    @staticmethod
    def mode(distribution):
        return None


class GaussianLikelihoodConv2d(LikelihoodModule):
    def __init__(self, input_shape, out_shape, kernel_size=3, activation="LeakyReLU", weightnorm=True):
        super().__init__(input_shape, out_shape, distribution=D.Normal, activation=activation)
        self.parameter_net = NormedSameConv2d(input_shape, 2 * out_shape[0], kernel_size, weightnorm=weightnorm)
        self.std_activation = nn.Softplus(beta=np.log(2))

    def get_distribution_kwargs(self, x):
        x = self.parameter_net(x)
        mu, lv = x.chunk(2, dim=1)
        scale = self.std_activation(lv)
        params = {
            "loc": mu,
            "scale": scale,
        }
        return params

    @staticmethod
    def log_likelihood(distribution, x):
        return distribution.log_prob(x).sum((1, 2, 3))

    @staticmethod
    def mode(distribution):
        return distribution.mean


class GaussianLikelihoodDense(LikelihoodModule):
    def __init__(self, input_shape, out_shape, activation="LeakyReLU", weightnorm=True):
        super().__init__(input_shape, out_shape, distribution=D.Normal, activation=activation)
        self.parameter_net = NormedDense(input_shape, 2 * np.prod(out_shape), weightnorm=weightnorm)
        self.std_activation = nn.Softplus(beta=np.log(2))

    def get_distribution_kwargs(self, x):
        x = self.parameter_net(x)
        mu, lv = x.chunk(2, dim=1)
        mu, lv = mu.view(-1, *self.out_shape), lv.view(-1, *self.out_shape)
        scale = self.std_activation(lv)
        params = {
            "loc": mu,
            "scale": scale,
        }
        return params

    @staticmethod
    def log_likelihood(distribution, x):
        return distribution.log_prob(x).sum(1)

    @staticmethod
    def mode(distribution):
        return distribution.mean


class BernoulliLikelihoodConv2d(LikelihoodModule):
    def __init__(self, input_shape, out_shape, kernel_size=3, activation="LeakyReLU", weightnorm=True):
        super().__init__(input_shape, out_shape, distribution=D.Bernoulli, activation=activation)
        self.parameter_net = NormedSameConv2d(input_shape, out_shape[0], kernel_size, weightnorm=weightnorm)

    def get_distribution_kwargs(self, x):
        return {"logits": self.parameter_net(x)}

    @staticmethod
    def log_likelihood(distribution, x):
        return distribution.log_prob(x).sum((1, 2, 3))

    @staticmethod
    def mode(distribution):
        return torch.round(distribution.probs)


class BernoulliLikelihoodDense(LikelihoodModule):
    def __init__(self, input_shape, out_shape, bias=True, activation="LeakyReLU", weightnorm=True):
        super().__init__(input_shape, out_shape, distribution=D.Bernoulli, activation=activation)
        self.parameter_net = NormedDense(input_shape, np.prod(out_shape), bias=bias, weightnorm=weightnorm)

    def get_distribution_kwargs(self, x):
        logits = self.parameter_net(x)
        logits = logits.view(-1, *self.out_shape)
        return {"logits": logits}

    @staticmethod
    def log_likelihood(distribution, x):
        all_dims_but_first = list(range(x.ndim))[1:]
        return distribution.log_prob(x).sum(all_dims_but_first)

    @staticmethod
    def mode(distribution):
        return BernoulliLikelihoodConv2d.mode(distribution)


class BernoulliLikelihoodIdentity(LikelihoodModule):
    def __init__(self, input_shape, out_shape, activation="Identity"):
        super().__init__(input_shape, out_shape, distribution=D.Bernoulli, activation="Identity")

    def get_distribution_kwargs(self, x):
        logits = x.view(-1, *self.out_shape)
        return {"logits": logits}

    @staticmethod
    def log_likelihood(distribution, x):
        all_dims_but_first = list(range(x.ndim))[1:]
        return distribution.log_prob(x).sum(all_dims_but_first)

    @staticmethod
    def mode(distribution):
        return BernoulliLikelihoodConv2d.mode(distribution)


class BetaLikelihoodConv2d(LikelihoodModule):
    def __init__(self, input_shape, out_shape, kernel_size=3, activation="LeakyReLU", weightnorm=True):
        super().__init__(input_shape, out_shape, distribution=D.Beta, activation=activation)
        self.parameter_net = NormedSameConv2d(input_shape, 2 * out_shape[0], kernel_size, weightnorm=weightnorm)
        self.concentration_activation = nn.Softplus()

    def get_distribution_kwargs(self, x):
        x = self.parameter_net(x)
        x = self.concentration_activation(x)
        alpha, beta = x.chunk(2, dim=1)
        params = {
            "concentration1": alpha,
            "concentration0": beta,
        }
        return params

    @staticmethod
    def log_likelihood(distribution, x):
        return distribution.log_prob(x).sum((1, 2, 3))

    @staticmethod
    def mode(distribution):
        return torch.round(distribution.mean)


class DiscretizedLogisticLikelihoodConv2d(LikelihoodModule):
    """
    Assume input data to be originally uint8 (0, ..., 255) and then rescaled
    by 1/255: discrete values in {0, 1/255, ..., 255/255}.

    If using the discretize logistic logprob implementation here, this should
    be rescaled by 255/256 and shifted by <1/256 in this class. So the data is
    inside 256 bins between 0 and 1.

    Note that mean and logscale are parameters of the underlying continuous
    logistic distribution, not of its discretization.

    From "Improved Variational Inference with Inverse Autoregressive Flow" paper:
        The ﬁrst layer of the encoder, and the last layer of the decoder, consist of convolutions that project from/to
        input space. The pixel data is scaled to the range [0, 1], and the data likelihood of pixel values in the
        generative model is the probability mass of the pixel value under the logistic distribution. Noting that the
        CDF of the standard logistic distribution is simply the sigmoid function, we simply compute the probability
        mass per input pixel using
            p(x_i | µ_i, s_i ) = CDF(x_i + 1/256 | µ_i, s_i) − CDF(x_i | µ_i, s_i ),
        where the locations µ_i are output of the decoder, and the log-scales log(s_i) are learned scalar
        parameter per input channel abd
            CDF(x|µ,s) = 1 / (1 + exp(-(x-µ)/s))
        is the cumulative distribution function for the logistic distribution.
    """

    log_scale_bias = -1.0

    def __init__(self, input_shape, out_shape, n_bins=256, activation="LeakyReLU", weightnorm=True, double=False):
        super().__init__(input_shape, out_shape, distribution=None, activation=activation)
        self.n_bins = n_bins
        self.double_precision = double
        self.out_channels = out_shape[0]
        self.parameter_net = NormedSameConv2d(input_shape, 2 * out_shape[0], kernel_size=3, weightnorm=weightnorm)

    def get_distribution_kwargs(self, x):
        x = self.parameter_net(x)
        mean, ls = x.chunk(2, dim=1)
        ls = ls + self.log_scale_bias
        ls = ls.clamp(min=-7.0)
        mean = mean + 0.5  # initialize to mid interval
        params = {
            "mean": mean,
            "logscale": ls,
        }
        return params

    @staticmethod
    def mean(params):
        return params["mean"]

    @staticmethod
    def mode(params):
        return params["mean"]

    @staticmethod
    def sample(params):
        # We're not quantizing 8bit, but it doesn't matter
        sample = logistic_rsample((params["mean"], params["logscale"]))
        sample = sample.clamp(min=0.0, max=1.0)
        return sample

    def log_likelihood(self, x, params):
        """Input data x should be inside (not at the edge) of n_bins equally-sized
        bins between 0 and 1. E.g. if n_bins=256 the 257 bin edges are:

            0, 1/256, ..., 255/256, 1.
        """
        x = x * (255 / 256) + 1 / 512

        logprob = log_discretized_logistic(
            x, params["mean"], params["logscale"], n_bins=self.n_bins, reduce="none", double=self.double_precision
        )
        return logprob

    def forward(self, x_p, x=None):
        distr_kwargs = self.get_distribution_kwargs(x_p)
        mean = self.mean(distr_kwargs)
        mode = self.mode(distr_kwargs)
        sample = self.sample(distr_kwargs)
        if x is None:
            likelihood = None
        else:
            likelihood = self.log_likelihood(x, distr_kwargs)

        data = LikelihoodData(
            likelihood=likelihood,
            distribution=None,
            mean=mean.clamp(0, 1),
            mode=mode.clamp(0, 1),
            variance=None,
            samples=sample,
            distribution_kwargs=distr_kwargs,
        )
        return likelihood, data


class DiscretizedLogisticMixLikelihoodConv2d(LikelihoodModule):
    """
    Sampling and loss computation are based on the original tf code.

    Assume input data to be originally uint8 (0, ..., 255) and then rescaled
    by 1/255: discrete values in {0, 1/255, ..., 255/255}.

    When using the original discretize logistic mixture logprob implementation,
    this data should be rescaled to be in [-1, 1] which is done in this module.

    Mean and mode are not implemented for now.

    Output channels for now is fixed to 3 and n_bins to 256.
    """

    def __init__(self, input_shape, out_shape, nr_mix=10, kernel_size=1, activation="LeakyReLU", weightnorm=True):
        """Discretized Logistic Mixture distribution

        Args:
            ch_in (int): Number of input channels
            nr_mix (int, optional): Number of components. Defaults to 10.
        """
        if out_shape[0] != 3:
            raise NotImplementedError("Currently does not support other than 3 color channels in output")
        
        out_channels = out_shape[0]
        out_features = (out_channels * 3 + 1) * nr_mix  # mean, variance and mixture coeff per channel plus logits

        super().__init__(input_shape, out_shape, distribution=None, activation=activation)
        self.parameter_net = NormedSameConv2d(input_shape, out_features, kernel_size=kernel_size, weightnorm=weightnorm)

    def get_distribution_kwargs(self, x):
        l = self.parameter_net(x)
        # mean, log_scale, coeff = discretized_mix_logistic_split_kwargs(l)
        params = {"mean": None, "all_params": l}
        return params

    @staticmethod
    def mean(params):
        return params["mean"]

    @staticmethod
    def mode(params):
        return params["mean"]

    @staticmethod
    def sample(params):
        samples = discretized_mix_logistic_rsample(params["all_params"])
        samples = (samples + 1) / 2  # Transform from [-1, 1] to [0, 1]
        samples = samples.clamp(min=0.0, max=1.0)
        return samples

    def log_likelihood(self, x, params):
        x = x * 2 - 1  # Transform from [0, 1] to [-1, 1]
        logprob = log_discretized_mix_logistic(x, params["all_params"])
        return logprob

    def forward(self, x_p, x=None):
        distr_kwargs = self.get_distribution_kwargs(x_p)
        mean = self.mean(distr_kwargs)
        mode = self.mode(distr_kwargs)
        samples = self.sample(distr_kwargs)
        if x is None:
            likelihood = None
        else:
            likelihood = self.log_likelihood(x, distr_kwargs)

        data = LikelihoodData(
            likelihood=likelihood,
            distribution=None,
            mean=samples,
            mode=samples,
            variance=None,
            samples=samples,
            distribution_kwargs=distr_kwargs,
        )
        return likelihood, data


class DiscretizedLogisticMixLikelihoodDense(LikelihoodModule):
    """
    Sampling and loss computation are based on the original tf code.

    Assume input data to be originally uint8 (0, ..., 255) and then rescaled
    by 1/255: discrete values in {0, 1/255, ..., 255/255}.

    When using the original discretize logistic mixture logprob implementation,
    this data should be rescaled to be in [-1, 1] which is done in this module.

    Mean and mode are not implemented for now.

    Output channels for now is fixed to 3 and n_bins to 256.
    """

    def __init__(self, input_shape, out_shape, nr_mix=10, kernel_size=1, activation="LeakyReLU", weightnorm=True):
        """Discretized Logistic Mixture distribution

        Args:
            ch_in (int): Number of input channels
            nr_mix (int, optional): Number of components. Defaults to 10.
        """
        if out_shape[0] != 3:
            raise NotImplementedError("Currently does not support other than 3 color channels in output")

        out_channels = out_shape[0]
        out_features = (out_channels * 3 + 1) * nr_mix  # mean, variance and mixture coeff per channel plus logits
        in_features = input_shape[0]  # Channel dimension (or simply feature dimension for dense)
        super().__init__(input_shape, out_shape, distribution=None, activation=activation)
        self.parameter_net = NormedLinear(in_features, out_features, dim=1, weightnorm=weightnorm)

    def get_distribution_kwargs(self, x):
        l = self.parameter_net(x)
        # mean, log_scale, coeff = discretized_mix_logistic_split_kwargs(l)
        params = {"mean": None, "all_params": l}
        return params

    @staticmethod
    def mean(params):
        return params["mean"]

    @staticmethod
    def mode(params):
        return params["mean"]

    @staticmethod
    def sample(params):
        samples = discretized_mix_logistic_rsample(params["all_params"])
        samples = (samples + 1) / 2  # Transform from [-1, 1] to [0, 1]
        samples = samples.clamp(min=0.0, max=1.0)
        return samples

    def log_likelihood(self, x, params):
        x = x * 2 - 1  # Transform from [0, 1] to [-1, 1]
        logprob = log_discretized_mix_logistic(x, params["all_params"])
        return logprob

    def forward(self, x_p, x=None):
        distr_kwargs = self.get_distribution_kwargs(x_p)
        mean = self.mean(distr_kwargs)
        mode = self.mode(distr_kwargs)
        samples = self.sample(distr_kwargs)
        if x is None:
            likelihood = None
        else:
            likelihood = self.log_likelihood(x, distr_kwargs)

        data = LikelihoodData(
            likelihood=likelihood,
            distribution=None,
            mean=samples,  # TODO We need the mean and mode here
            mode=samples,  # TODO We need the mean and mode here
            variance=None,
            samples=samples,
            distribution_kwargs=distr_kwargs,
        )
        return likelihood, data


def logistic_rsample(mu_ls):
    """
    Returns a sample from Logistic with specified mean and log scale.

    :param mu_ls: a tensor containing mean and log scale along dim=1,
            or a tuple (mean, log scale)
    :return: a reparameterized sample with the same size as the input
            mean and log scale
    """
    # Get parameters
    try:
        mu, log_scale = torch.chunk(mu_ls, 2, dim=1)
    except TypeError:
        mu, log_scale = mu_ls
    scale = log_scale.exp()

    # Get uniform sample in open interval (0, 1)
    u = torch.zeros_like(mu)
    u.uniform_(1e-7, 1 - 1e-7)

    # Transform into logistic sample
    sample = mu + scale * (torch.log(u) - torch.log(1 - u))

    return sample


def discretized_mix_logistic_rsample(l):
    """
    Code taken from pytorch adaptation of original PixelCNN++ tf implementation
    https://github.com/pclucas14/pixel-cnn-pp
    """

    def to_one_hot(tensor, n):
        one_hot = torch.zeros(tensor.size() + (n,), device=tensor.device)
        one_hot.scatter_(len(tensor.size()), tensor.unsqueeze(-1), 1.0)
        return one_hot

    # Pytorch ordering
    l = l.permute(0, 2, 3, 1)  # "channels first" to "channels last"
    ls = [int(y) for y in l.size()]
    xs = ls[:-1] + [3]

    # here and below: unpacking the params of the mixture of logistics
    nr_mix = int(ls[-1] / 10)

    # unpack parameters
    logit_probs = l[:, :, :, :nr_mix]
    l = l[:, :, :, nr_mix:].contiguous().view(xs + [nr_mix * 3])

    # sample mixture indicator from softmax
    temp = torch.empty_like(logit_probs).uniform_(1e-5, 1.0 - 1e-5)
    temp = logit_probs.data - torch.log(-torch.log(temp))  # TODO Remove .data
    _, argmax = temp.max(dim=3)

    one_hot = to_one_hot(argmax, nr_mix)
    sel = one_hot.view(xs[:-1] + [1, nr_mix])
    # select logistic parameters
    means = torch.sum(l[:, :, :, :, :nr_mix] * sel, dim=4)
    log_scales = torch.clamp(torch.sum(l[:, :, :, :, nr_mix : 2 * nr_mix] * sel, dim=4), min=-7.0)
    coeffs = torch.sum(torch.tanh(l[:, :, :, :, 2 * nr_mix : 3 * nr_mix]) * sel, dim=4)
    # sample from logistic & clip to interval
    # we don't actually round to the nearest 8bit value when sampling
    u = torch.empty_like(means).uniform_(1e-5, 1.0 - 1e-5)
    x = means + torch.exp(log_scales) * (torch.log(u) - torch.log(1.0 - u))
    x0 = torch.clamp(torch.clamp(x[:, :, :, 0], min=-1.0), max=1.0)
    x1 = torch.clamp(torch.clamp(x[:, :, :, 1] + coeffs[:, :, :, 0] * x0, min=-1.0), max=1.0)
    x2 = torch.clamp(torch.clamp(x[:, :, :, 2] + coeffs[:, :, :, 1] * x0 + coeffs[:, :, :, 2] * x1, min=-1.0), max=1.0)

    out = torch.cat([x0.view(xs[:-1] + [1]), x1.view(xs[:-1] + [1]), x2.view(xs[:-1] + [1])], dim=3)
    # put back in Pytorch ordering
    out = out.permute(0, 3, 1, 2)
    return out


def log_discretized_logistic(x, mean, log_scale, n_bins=256, reduce="mean", double=False):
    """
    Log of the probability mass of the values x under the logistic distribution
    with parameters mean and scale. The sum is taken over all dimensions except
    for the first one (assumed to be batch). Reduction is applied at the end.

    Assume input data to be inside (not at the edge) of n_bins equally-sized
    bins between 0 and 1. E.g. if n_bins=256 the 257 bin edges are:
    0, 1/256, ..., 255/256, 1.
    If values are at the left edge it's also ok, but let's be on the safe side

    Variance of logistic distribution is
        var = scale^2 * pi^2 / 3

    :param x: tensor with shape (batch, channels, dim1, dim2)
    :param mean: tensor with mean of distribution, shape
                 (batch, channels, dim1, dim2)
    :param log_scale: tensor with log scale of distribution, shape has to be either
                  scalar or broadcastable
    :param n_bins: bin size (default: 256)
    :param reduce: reduction over batch: 'mean' | 'sum' | 'none'
    :param double: whether double precision should be used for computations
    :return:
    """
    log_scale = _input_check(x, mean, log_scale, reduce)
    if double:
        log_scale = log_scale.double()
        x = x.double()
        mean = mean.double()
        eps = 1e-14
    else:
        eps = 1e-7

    scale = log_scale.exp()

    # Set values to the left of each bin
    x = torch.floor(x * n_bins) / n_bins

    cdf_plus = torch.ones_like(x)
    idx = x < (n_bins - 1) / n_bins
    cdf_plus[idx] = torch.sigmoid((x[idx] + 1 / n_bins - mean[idx]) / scale[idx])

    cdf_minus = torch.zeros_like(x)
    idx = x >= 1 / n_bins
    cdf_minus[idx] = torch.sigmoid((x[idx] - mean[idx]) / scale[idx])

    log_prob = torch.log(cdf_plus - cdf_minus + eps)

    log_prob = log_prob.sum((1, 2, 3))
    log_prob = _reduce(log_prob, reduce)
    if double:
        log_prob = log_prob.float()
    return log_prob


def log_discretized_mix_logistic(x, l):
    """Log-likelihood for mixture of discretized logistics

    Assumes the data has been rescaled to [-1, 1] interval and that the input is
    colour images with 3 channels (channels first)

    Code taken from pytorch adaptation of original PixelCNN++ tf implementation
    https://github.com/pclucas14/pixel-cnn-pp

    Args:
        x (torch.Tensor): Original input image (the true distribution) as (B, C, H, W)
        l (torch.Tensor): Predicted distribution over the image space as (B, C * N_components, H, W)

    Returns:
        torch.Tensor: Likelihood
    """

    # channels last
    x = x.permute(0, 2, 3, 1)
    l = l.permute(0, 2, 3, 1)

    # true image (i.e. labels) to regress to, e.g. (B,32,32,3)
    xs = [int(y) for y in x.size()]
    # predicted distribution, e.g. (B,32,32,100)
    ls = [int(y) for y in l.size()]

    assert xs[-1] == 3, "Discretized Logistic Mixture likelihood is only applicable to RGB images (not gray-scale)"
    assert -1.0 <= x.min() and x.max() <= 1.0

    # Unpack the parameters of the mixture of logistics.
    # We need four quantities: logit probs, means, logs_scales and coeffs
    # - logit_probs: (B, H, W, nr_mix)
    # - means: (B, H, W, C, nr_mix)
    # - log_scales: (B, H, W, C, nr_mix)
    # - coeffs: (B, H, W, C, nr_mix)
    # This gives in total a number of parameters of: nr_mix * C * 3 + nr_mix
    nr_mix = int(ls[-1] / 10)
    logit_probs = l[:, :, :, :nr_mix]
    l = l[:, :, :, nr_mix:].contiguous().view(xs + [nr_mix * 3])  # 3 for mean, scale, coef for each mixture component
    means = l[:, :, :, :, :nr_mix]
    log_scales = torch.clamp(l[:, :, :, :, nr_mix : 2 * nr_mix], min=-7.0)
    coeffs = torch.tanh(l[:, :, :, :, 2 * nr_mix : 3 * nr_mix])

    # Get the means and adjust them based on preceding
    # sub-pixels
    x = x.contiguous()
    x = x.unsqueeze(-1)
    m2 = (means[:, :, :, 1, :] + coeffs[:, :, :, 0, :] * x[:, :, :, 0, :]).view(xs[0], xs[1], xs[2], 1, nr_mix)

    m3 = (
        means[:, :, :, 2, :] + coeffs[:, :, :, 1, :] * x[:, :, :, 0, :] + coeffs[:, :, :, 2, :] * x[:, :, :, 1, :]
    ).view(xs[0], xs[1], xs[2], 1, nr_mix)

    means = torch.cat((means[:, :, :, 0, :].unsqueeze(3), m2, m3), dim=3)
    centered_x = x - means
    inv_stdv = torch.exp(-log_scales)
    plus_in = inv_stdv * (centered_x + 1.0 / 255.0)
    cdf_plus = torch.sigmoid(plus_in)
    min_in = inv_stdv * (centered_x - 1.0 / 255.0)
    cdf_min = torch.sigmoid(min_in)
    # log probability for edge case of 0 (before scaling)
    log_cdf_plus = plus_in - F.softplus(plus_in)
    # log probability for edge case of 255 (before scaling)
    log_one_minus_cdf_min = -F.softplus(min_in)
    cdf_delta = cdf_plus - cdf_min  # probability for all other cases
    mid_in = inv_stdv * centered_x
    # log probability in the center of the bin, to be used in extreme cases
    # (not actually used in our code)
    log_pdf_mid = mid_in - log_scales - 2.0 * F.softplus(mid_in)

    # now select the right output: left edge case, right edge case, normal
    # case, extremely low prob case (doesn't actually happen for us)

    # this is what we are really doing, but using the robust version below
    # for extreme cases in other applications and to avoid NaN issue with tf.select()
    # log_probs = tf.select(x < -0.999, log_cdf_plus, tf.select(x > 0.999,
    # log_one_minus_cdf_min, tf.log(cdf_delta)))

    # robust version, that still works if probabilities are below 1e-5 (which
    # never happens in our code)
    # tensorflow backpropagates through tf.select() by multiplying with zero
    # instead of selecting: this requires use to use some ugly tricks to avoid
    # potential NaNs
    # the 1e-12 in tf.maximum(cdf_delta, 1e-12) is never actually used as
    # output, it's purely there to get around the tf.select() gradient issue
    # if the probability on a sub-pixel is below 1e-5, we use an approximation
    # based on the assumption that the log-density is constant in the bin of
    # the observed sub-pixel value

    inner_inner_cond = (cdf_delta > 1e-5).float()
    inner_inner_out = inner_inner_cond * torch.log(torch.clamp(cdf_delta, min=1e-12)) + (1.0 - inner_inner_cond) * (
        log_pdf_mid - np.log(127.5)
    )
    inner_cond = (x > 0.999).float()
    inner_out = inner_cond * log_one_minus_cdf_min + (1.0 - inner_cond) * inner_inner_out
    cond = (x < -0.999).float()
    log_probs = cond * log_cdf_plus + (1.0 - cond) * inner_out
    log_probs = torch.sum(log_probs, dim=3) + torch.log_softmax(logit_probs, dim=-1)
    log_probs = torch.logsumexp(log_probs, dim=-1)

    # return -torch.sum(log_probs)
    log_prob = log_probs.sum((1, 2))  # keep batch dimension
    return log_prob


def _reduce(x, reduce):
    if reduce == "mean":
        x = x.mean()
    elif reduce == "sum":
        x = x.sum()
    return x


def _input_check(x, mean, scale_param, reduce):
    assert x.dim() == 4
    assert x.size() == mean.size()
    if scale_param.numel() == 1:
        scale_param = scale_param.view(1, 1, 1, 1)
    if reduce not in ["mean", "sum", "none"]:
        msg = "unrecognized reduction method '{}'".format(reduce)
        raise RuntimeError(msg)
    return scale_param


def get_likelihood(name):
    try:
        klass = globals()[name]
    except KeyError:
        raise KeyError(f"Likelihood layer `{name}` not recognized")
    return klass
