# Supplementary material
Source: ML conference proceedings conference paper supplement (https://proceedings.neurips.cc/paper_files/paper/2022/hash/3066f60a91d652f4dc690637ac3a2f8c-Abstract.html)
Supplement: Supplementary file 1 [file 3066f60a91d652f4dc690637ac3a2f8c-Supplemental-Conference.zip › nips_hvae_Supplementary Material/nips22_hvae_ood_code/oodd/models/__init__.py]

from oodd.models.checkpointing import Checkpoint, CheckpointList
from oodd.models.base_module import BaseModule, load_model
from oodd.models.dvae import DeepVAE, VAE, LVAE, BIVA
