# Supplementary material
Source: ML conference proceedings conference paper supplement (https://proceedings.neurips.cc/paper_files/paper/2022/hash/3066f60a91d652f4dc690637ac3a2f8c-Abstract.html)
Supplement: Supplementary file 1 [file 3066f60a91d652f4dc690637ac3a2f8c-Supplemental-Conference.zip › nips_hvae_Supplementary Material/nips22_hvae_ood_code/oodd/models/base_module.py]

import inspect
import logging
import os

import torch
import torch.nn as nn

import oodd.models


LOGGER = logging.getLogger(name=__file__)

# MODEL_CLASS_NAME_STR = 'model_class_name.pt'
# MODEL_INIT_KWRGS_STR = 'model_kwargs.pt'
# MODEL_STATE_DICT_STR = 'model_state_dict.pt'

MODEL_CLASS_NAME_STR = 'model_class_name'
MODEL_INIT_KWRGS_STR = 'model_kwargs'
MODEL_STATE_DICT_STR = 'model_state_dict'

def load_model(path, model_class_name: str = None, device: str = 'cpu'):
    if model_class_name is None:
        if os.path.exists(os.path.join(path, MODEL_CLASS_NAME_STR+'.pt')):
            model_class_name = torch.load(os.path.join(path, MODEL_CLASS_NAME_STR+'.pt'), map_location=device)
            LOGGER.debug(f"Loading '{model_class_name}' from 'oodd.models'")
        else:
            raise RuntimeError(f'Name of class of model to load not specified and not saved in checkpoint: {path}')

    model_class = getattr(oodd.models, model_class_name)
    model = model_class.load(path, device=device)
    return model


class BaseModule(nn.Module):
    """Base class for end-use type Modules (e.g. models)"""

    def __init__(self):
        super().__init__()
        signature = inspect.signature(self.__class__.__init__)
        self._kwarg_names = [p for p in signature.parameters if p != 'self']
        self._init_arguments = None

    def init_arguments(self):
        """Return a dictionary of the kwargs used to instantiate this module"""
        if self._init_arguments is None:
            self._init_arguments = self._get_init_arguments()
        return self._init_arguments

    def _get_init_arguments(self):
        """Retrieve the values of keyword arguments used to instantiate this Module (assumes they are all properties)"""
        missing_names = [name for name in self._kwarg_names if name not in vars(self)]

        if len(missing_names) > 0:
            msg = f'Models need to define the `kwargs` to `__init__` as attributes but {str(self.__class__)} is ' \
                    f'missing the following attributes: {missing_names}.'
            raise RuntimeError(msg)

        init_arguments = {attr: getattr(self, attr) for attr in self._kwarg_names}
        return init_arguments

    @property
    def device(self):
        """Heuristically return the device which this model is on"""
        return next(self.parameters()).device

    def save(self, path, idx='_latest'):
        """Save the module class name, init_arguments and state_dict to different files in the directory given by path"""
        os.makedirs(path, exist_ok=True)
        torch.save(self.__class__.__name__, os.path.join(path, MODEL_CLASS_NAME_STR+idx+'.pt'))
        torch.save(self.init_arguments(), os.path.join(path, MODEL_INIT_KWRGS_STR+idx+'.pt'))
        torch.save(self.state_dict(), os.path.join(path, MODEL_STATE_DICT_STR+idx+'.pt'))

    @classmethod
    def load(cls, path, device: str = 'cpu'):
        """Return an instance of the concrete module instantiated using saved init_arguments and with state_dict loaded"""
        model_kwargs = torch.load(os.path.join(path, MODEL_INIT_KWRGS_STR+'.pt'), map_location=device)
        kwargs = model_kwargs.pop('kwargs', {})
        args = model_kwargs.pop('args', [])

        model = cls(*args, **kwargs, **model_kwargs)
        model.to(device)

        state_dict = torch.load(os.path.join(path, MODEL_STATE_DICT_STR+'.pt'), map_location=device)
        model.load_state_dict(state_dict)
        return model

    def extra_repr(self):
        """All init_arguments as extra representation in a string formatted as a dictionary"""
        if not self.init_arguments():
            return ''
        s = ',\n  '.join(f'{k}={v}' for k, v in self.init_arguments().items() if not isinstance(v, nn.Module))
        s = 'kwargs={\n' + '  ' + s + '\n}'
        return s
