# Supplementary material
Source: ML conference proceedings conference paper supplement (https://proceedings.neurips.cc/paper_files/paper/2022/hash/3066f60a91d652f4dc690637ac3a2f8c-Abstract.html)
Supplement: Supplementary file 1 [file 3066f60a91d652f4dc690637ac3a2f8c-Supplemental-Conference.zip › nips_hvae_Supplementary Material/nips22_hvae_ood_code/oodd/utils/__init__.py]

from oodd.utils import plotting

from oodd.utils.init import *
from oodd.utils.argparsing import str2bool
from oodd.utils.device import get_device, test_gpu_functionality
from oodd.utils.files import read_yaml_file
from oodd.utils.operations import *
from oodd.utils.plotting import gallery, plot_gallery, plot_roc_curve, plot_likelihood_distributions
from oodd.utils.rand import set_seed
from oodd.utils.shape import flatten_sample_dim, elevate_sample_dim, copy_to_new_dim
