# Supplementary material
Source: ML conference proceedings conference paper supplement (https://proceedings.neurips.cc/paper_files/paper/2022/hash/3066f60a91d652f4dc690637ac3a2f8c-Abstract.html)
Supplement: Supplementary file 1 [file 3066f60a91d652f4dc690637ac3a2f8c-Supplemental-Conference.zip › nips_hvae_Supplementary Material/nips22_hvae_ood_code/oodd/utils/operations.py]

import torch

from .shape import elevate_sample_dim


def reduce_batch(tensor, batch_dim=0, reduction=torch.sum):
    """Reduce the batch dimension.

    Given (D*, B, D*) returns (D*, D*)
    """
    return reduction(tensor, axis=batch_dim)


def reduce_samples(tensor, batch_dim=0, sample_dim=0, n_samples=None, reduction=torch.sum):
    """Reduce the posterior or prior samples whether they are in a separate dimension or in the batch_dimension.

    Given shape (B, S, D*) returns (B, D*).
    Given shape (B * S, D*) returns (B, D*).

    Typically, the D dimensions will not exist.
    """
    if batch_dim == sample_dim:
        if n_samples is None:
            raise ValueError(f"When 'batch_dim'=='sample_dim' ({batch_dim}), the number of samples must be supplied")
        if batch_dim != 0:
            raise ValueError(f"Cannot reduce samples for 'batch_dim' other than 0 but got '{batch_dim}'")

        tensor = elevate_sample_dim(tensor, n_samples)
        batch_dim = batch_dim + 1
        sample_dim = 0

    return reduction(tensor, dim=sample_dim)


def reduce_to_batch(tensor, batch_dim=0, reduction=torch.sum):
    """Assuming that the batch dimension is the left-most dimension, reduce all others by summation.

    Given shape (B, D*) returns (B,).
    """
    reduce_dims = list(range(tensor.ndim))
    if not reduce_dims:
        return tensor

    reduce_dims.remove(batch_dim)

    if not reduce_dims:
        return tensor
    return reduction(tensor, dim=reduce_dims)


def reduce_to_latent(tensor, batch_dim=0, latent_dim=1, reduction=torch.sum):
    """Assuming that the batch and latent dimensions are 0 and 1, respectively, reduce all others by sumnmation.

    Given shape (B, L, D*) returns (B, L).
    """
    reduce_dims = list(range(tensor.ndim))
    if not reduce_dims:
        return tensor

    reduce_dims.remove(batch_dim)
    reduce_dims.remove(latent_dim)

    if not reduce_dims:
        return tensor
    return reduction(tensor, dim=reduce_dims)


def log_sum_exp(tensor, axis=-1, dim=None, sum_op=torch.mean):
    """Uses the LogSumExp (LSE) as an approximation for the sum in a log-domain.

    :param tensor: Tensor to compute LSE over
    :param axis: dimension to perform operation over
    :param sum_op: reductive operation to be applied, e.g. torch.sum or torch.mean
    :return: LSE
    """
    axis = dim if dim is not None else axis
    maximum, _ = torch.max(tensor, axis=axis, keepdim=False)
    return torch.log(sum_op(torch.exp(tensor - maximum), axis=axis, keepdim=False) + 1e-8) + maximum


def first_nonnegative(tensor, axis=0):
    """Returns the index of the first nonnegative element in the tensor and if any elements where nonnegative.

    An element is the first nonzero element if it is nonzero and the cumulative sum of a nonzero indicator is 1.

    If there are no nonnegative elements, this method returns value_for_all_nonnegative (-1 by default).

    Example:
        x = torch.randn(5, 7)
        x[3, 3] = 0
        any_nonneg, idx_first_nonneg = first_nonnegative(x)

    Args:
        x (torch.Tensor): Tensor of some shape
        axis (int): The axis along which to operate

    Returns:
        any_nonneg (torch.Tensor): Boolean array `True` where at least one element was nonnegative.
        idx_first_nonneg (torch.Tensor): Integer array of indices where the first nonnegative element is.
                                         Equal to -1 where no nonnegative elements where found.
    """
    nonneg = tensor > 0
    any_nonneg, idx_first_nonneg = ((nonneg.cumsum(axis) == 1) & nonneg).max(axis)
    idx_first_nonneg[~any_nonneg] = -1
    return any_nonneg, idx_first_nonneg


def detach(x):
    """detach a tensor from the computational graph"""
    if x is not None:
        if isinstance(x, torch.Tensor):
            return x.detach()
        else:
            return x
    else:
        return None


def detach_to_device(x, device):
    """detach a tensor from the computational graph, clone and place it on the given device"""
    if x is not None:
        if isinstance(x, torch.Tensor):
            return x.detach().clone().to(device)
        else:
            return torch.tensor(x, device=device, dtype=torch.float)
    else:
        return None
