# Supplementary material
Source: ML conference proceedings conference paper supplement (https://proceedings.neurips.cc/paper_files/paper/2022/hash/3066f60a91d652f4dc690637ac3a2f8c-Abstract.html)
Supplement: Supplementary file 1 [file 3066f60a91d652f4dc690637ac3a2f8c-Supplemental-Conference.zip › nips_hvae_Supplementary Material/nips22_hvae_ood_code/oodd/utils/rand.py]

import random

import torch
import numpy as np

import logging


LOGGER = logging.getLogger(name="oodd.utils.random")


def set_seed(seed):
    """Set the random number generation seed globally for `torch`, `numpy` and `random`"""
    np.random.seed(seed)
    torch.manual_seed(seed)
    random.seed(seed)
    LOGGER.info("Set 'numpy', 'random' and 'torch' random seed to %s", seed)
