# Supplementary material
Source: ML conference proceedings conference paper supplement (https://proceedings.neurips.cc/paper_files/paper/2022/hash/3066f60a91d652f4dc690637ac3a2f8c-Abstract.html)
Supplement: Supplementary file 1 [file 3066f60a91d652f4dc690637ac3a2f8c-Supplemental-Conference.zip › nips_hvae_Supplementary Material/nips22_hvae_ood_code/ReadMe.txt]

This code is the implemention for the paper "Out-of-Distribution Detection with An Adaptive
Likelihood Ratio on Informative Hierarchical VAE". 


For running, just run "python scripts/dvae_run_cifar.py" and "python scripts/dvae_run_fmnist.py". 


The code would be public after the paper is accepted.
Most of the code is based on the https://github.com/JakobHavtorn/hvae-oodd. 
Thanks for their contribution and more detailed instruction could be seen their project.
