# Supplementary material
Source: ML conference proceedings conference paper supplement (https://proceedings.neurips.cc/paper_files/paper/2022/hash/3066f60a91d652f4dc690637ac3a2f8c-Abstract.html)
Supplement: Supplementary file 1 [file 3066f60a91d652f4dc690637ac3a2f8c-Supplemental-Conference.zip › nips_hvae_Supplementary Material/nips22_hvae_ood_code/scripts/dvae_run_cifar.py]

import argparse
import datetime
import logging
import os

import matplotlib.pyplot as plt
import numpy as np
import rich
import sklearn.metrics
import torch
import torch.utils.data

from tqdm import tqdm

import oodd
import oodd.models
import oodd.datasets
import oodd.variational
import oodd.losses

from oodd.utils import str2bool, get_device, log_sum_exp, set_seed, plot_gallery
from oodd.evaluators import Evaluator
from oodd.utils.argparsing import json_file_or_json_unique_keys
from oodd.utils.argparsing import str2bool, json_file_or_json

LOGGER = logging.getLogger(name=__file__)


try:
    import wandb
    wandb_available = True
except ImportError:
    LOGGER.warning("Running without remote tracking!")
    wandb_available = False

train_datasets = '{ "CIFAR10Dequantized": {"dynamic": true, "split": "train"}}'
val_datasets = '{"CIFAR10Dequantized": {"dynamic": false, "split": "validation"}, "SVHNDequantized": {"dynamic": false, "split": "validation"}}'

likelihood = 'DiscretizedLogisticMixLikelihoodConv2d'


config_deterministic = '[' \
                       '[{"block": "ResBlockConv2d", "out_channels": 256, "kernel_size": 5, "stride": 1, "weightnorm": true, "gated": false},' \
                       '{"block": "ResBlockConv2d", "out_channels": 256, "kernel_size": 5, "stride": 1, "weightnorm": true, "gated": false},        ' \
                       '{"block": "ResBlockConv2d", "out_channels": 256, "kernel_size": 5, "stride": 2, "weightnorm": true, "gated": false}' \
                       '], ' \
                       '[{"block": "ResBlockConv2d", "out_channels": 256, "kernel_size": 3, "stride": 1, "weightnorm": true, "gated": false},' \
                       '{"block": "ResBlockConv2d", "out_channels": 256, "kernel_size": 3, "stride": 1, "weightnorm": true, "gated": false},        ' \
                       '{"block": "ResBlockConv2d", "out_channels": 256, "kernel_size": 3, "stride": 2, "weightnorm": true, "gated": false}' \
                       '], ' \
                       '[{"block": "ResBlockConv2d", "out_channels": 256, "kernel_size": 3, "stride": 1, "weightnorm": true, "gated": false}, ' \
                       '{"block": "ResBlockConv2d", "out_channels": 256, "kernel_size": 3, "stride": 1, "weightnorm": true, "gated": false},        ' \
                       '{"block": "ResBlockConv2d", "out_channels": 256, "kernel_size": 3, "stride": 2, "weightnorm": true, "gated": false} ' \
                       '] ' \
                        ']'

config_stochastic = '[' \
    '{"block": "GaussianConv2d", "latent_features": 128, "weightnorm": true},' \
    '{"block": "GaussianConv2d", "latent_features": 64, "weightnorm": true},' \
    '{"block": "GaussianDense", "latent_features": 32, "weightnorm": true}' \
    ']'

n_latents = 3
device = get_device(2)

parser = argparse.ArgumentParser(description="VAE MNIST Example")
parser.add_argument("--model", default="VAE", help="VAE")
parser.add_argument("--augment", default="dc", help="deep hierarchical VAE with connections for higher z and data x")
parser.add_argument("--warmup_epochs", type=int, default=0, help="epochs to warm up the KL term.")
parser.add_argument("--kl_weight", type=float, default=0.1, help="fixes_kl_weigth, if not use warmup.")

parser.add_argument("--train_datasets", type=json_file_or_json_unique_keys, default=train_datasets)
parser.add_argument("--val_datasets", type=json_file_or_json_unique_keys, default=val_datasets)
parser.add_argument("--test_datasets", type=json_file_or_json_unique_keys, default=[])

parser.add_argument("--config_deterministic", type=json_file_or_json, default=config_deterministic, help="")
parser.add_argument("--config_stochastic", type=json_file_or_json, default=config_stochastic, help="")

parser.add_argument("--epochs", type=int, default=1000, help="number of epochs to train")
parser.add_argument("--learning_rate", type=float, default=3e-4, help="learning rate")
parser.add_argument("--train_samples", type=int, default=1, help="samples from approximate posterior")
parser.add_argument("--test_samples", type=int, default=1, help="samples from approximate posterior")
parser.add_argument("--train_importance_weighted", type=str2bool, default=False, const=True, nargs="?", help="use iw bound")
parser.add_argument("--test_importance_weighted", type=str2bool, default=False, const=True, nargs="?", help="use iw bound")

parser.add_argument("--free_nats_epochs", type=int, default=0, help="epochs to warm up the KL term.")
parser.add_argument("--free_nats", type=float, default=0, help="nats considered free in the KL term")
parser.add_argument("--n_eval_samples", type=int, default=32, help="samples from prior for quality inspection")
parser.add_argument("--seed", type=int, default=1, metavar="S", help="random seed")
parser.add_argument("--test_every", type=int, default=1, help="epochs between evaluations")
parser.add_argument("--save_dir", type=str, default="./models", help="directory for saving models")
parser.add_argument("--use_wandb", type=str2bool, default=True, help="use wandb tracking")
parser.add_argument("--name", type=str, default=True, help="wandb tracking name")
parser = oodd.datasets.DataModule.get_argparser(parents=[parser])

args, unknown_args = parser.parse_known_args()

args.start_time = str(datetime.datetime.now()).replace(" ", "-").replace(":", "-")
args.train_sample_reduction = log_sum_exp if args.train_importance_weighted else torch.mean
args.test_sample_reduction = log_sum_exp if args.test_importance_weighted else torch.mean
args.use_wandb = wandb_available and args.use_wandb

set_seed(args.seed)
print(args.seed)


def train(epoch):
    model.train()
    evaluator = Evaluator(primary_metric="log p(x)", logger=LOGGER, use_wandb=args.use_wandb)

    if args.warmup_epochs == 0:
        beta = args.kl_weight
    else:
        beta = next(deterministic_warmup)
    free_nats = next(free_nats_cooldown)
    print(args.seed)
    iterator = tqdm(enumerate(datamodule.train_loader), smoothing=0.9, total=len(datamodule.train_loader), leave=False)
    for _, (x, _) in iterator:
        x = x.to(device)

        if args.augment == 'dc':
            likelihood_data, stage_datas, skip_recon_likelihood = model(x, n_posterior_samples=args.train_samples,
                                                                        augment=args.augment)
            kl_divergences = [
                stage_data.loss.kl_elementwise for stage_data in stage_datas if
                stage_data.loss.kl_elementwise is not None
            ]
            likelihood_total = torch.zeros_like(skip_recon_likelihood[0].likelihood)
            for like_i in range(len(skip_recon_likelihood)):
                likelihood_total += skip_recon_likelihood[like_i].likelihood * (1/n_latents)  # <<<<<<<<<<<<<<<<<<<<<<<<<<<<<<<<<<<<<<<<<<<<<<<<<<<< scale by 1/L
            likelihood_loss = likelihood_total

            loss, elbo, likelihood, kl_divergences = criterion(
                likelihood_loss,  # likelihood_data.likelihood,
                kl_divergences,
                samples=args.train_samples,
                free_nats=free_nats,
                beta=beta,
                sample_reduction=args.train_sample_reduction,
                batch_reduction=None,
            )

            l = loss.mean()
            l.backward()

            optimizer.step()
            optimizer.zero_grad()

        # elif args.augment == 'dc-policy':
        #     for step in range(n_latents):
        #         likelihood_data, stage_datas, skip_recon_likelihood = model(x, n_posterior_samples=args.train_samples,
        #                                                                 augment=args.augment)
        #         kl_divergences = [
        #             stage_data.loss.kl_elementwise for stage_data in stage_datas if
        #             stage_data.loss.kl_elementwise is not None
        #         ]
        #
        #         likelihood_total = torch.zeros_like(skip_recon_likelihood[0].likelihood)
        #         kl_total = []
        #         for like_i in range(step, len(skip_recon_likelihood)):
        #             likelihood_total += skip_recon_likelihood[like_i].likelihood * pow(args.gamma, like_i-step)
        #             # kl_total += [
        #             # stage_data.loss.kl_elementwise * pow(args.gamma, like_i-step) for stage_data in stage_datas[like_i:len(skip_recon_likelihood)] if
        #             # stage_data.loss.kl_elementwise is not None
        #             # ]
        #             kl_total += [ stage_datas[like_i].loss.kl_elementwise * pow(args.gamma, like_i - step) ]
        #         likelihood_loss = likelihood_total
        #
        #
        #         loss, _, _, _ = criterion(
        #             likelihood_loss,  # likelihood_data.likelihood,
        #             kl_total,
        #             samples=args.train_samples,
        #             free_nats=free_nats,
        #             beta=beta,
        #             sample_reduction=args.train_sample_reduction,
        #             batch_reduction=None,
        #         )
        #
        #         l = loss.mean()
        #         l.backward()
        #
        #         optimizer.step()
        #         optimizer.zero_grad()
        #
        # elif args.augment == 'dc-layerwise':
        #     for step in range(n_latents):
        #         likelihood_data, stage_datas, skip_recon_likelihood = model(x, n_posterior_samples=args.train_samples,
        #                                                                 augment=args.augment)
        #         kl_divergences = [
        #             stage_data.loss.kl_elementwise for stage_data in stage_datas if
        #             stage_data.loss.kl_elementwise is not None
        #         ]
        #
        #         likelihood_total = torch.zeros_like(skip_recon_likelihood[0].likelihood)
        #         kl_total = []
        #         # for like_i in range(step, len(skip_recon_likelihood)):
        #         #     likelihood_total += skip_recon_likelihood[like_i].likelihood * pow(args.gamma, like_i-step)
        #         #     kl_total += [
        #         #     stage_data.loss.kl_elementwise * pow(args.gamma, like_i-step) for stage_data in stage_datas[like_i:len(skip_recon_likelihood)] if
        #         #     stage_data.loss.kl_elementwise is not None
        #         #     ]
        #         likelihood_total += skip_recon_likelihood[step].likelihood
        #         kl_total += [
        #             stage_datas[step].loss.kl_elementwise
        #         ]
        #
        #         likelihood_loss = likelihood_total
        #
        #         loss, _, _, _ = criterion(
        #             likelihood_loss,  # likelihood_data.likelihood,
        #             kl_total,
        #             samples=args.train_samples,
        #             free_nats=free_nats,
        #             beta=beta,
        #             sample_reduction=args.train_sample_reduction,
        #             batch_reduction=None,
        #         )
        #
        #         l = loss.mean()
        #         l.backward()
        #
        #         optimizer.step()
        #         optimizer.zero_grad()
        #

        else:
            likelihood_data, stage_datas, skip_recon_likelihood = model(x, n_posterior_samples=args.train_samples,
                                                                        augment=args.augment)
            kl_divergences = [
                stage_data.loss.kl_elementwise for stage_data in stage_datas if
                stage_data.loss.kl_elementwise is not None
            ]
            likelihood_loss = likelihood_data.likelihood

            loss, elbo, likelihood, kl_divergences = criterion(
                likelihood_loss,  # likelihood_data.likelihood,
                kl_divergences,
                samples=args.train_samples,
                free_nats=free_nats,
                beta=beta,
                sample_reduction=args.train_sample_reduction,
                batch_reduction=None,
            )

            l = loss.mean()
            l.backward()

            optimizer.step()
            optimizer.zero_grad()

        # additionally run for compute elbo
        with torch.no_grad():
            likelihood_data, stage_datas, skip_recon_likelihood = model(x, n_posterior_samples=args.train_samples,
                                                                        augment=args.augment)
            kl_divergences = [
                stage_data.loss.kl_elementwise for stage_data in stage_datas if
                stage_data.loss.kl_elementwise is not None
            ]
            likelihood_loss = likelihood_data.likelihood
            loss, elbo, likelihood, kl_divergences = criterion(
                likelihood_loss,  # likelihood_data.likelihood,
                kl_divergences,
                samples=args.train_samples,
                free_nats=free_nats,
                beta=beta,
                sample_reduction=args.train_sample_reduction,
                batch_reduction=None,
            )

        # l = loss.mean()
        # l.backward()
        #
        # optimizer.step()
        # optimizer.zero_grad()

        evaluator.update("Train", "elbo", {"log p(x)": elbo})
        # evaluator.update("Train", "likelihoods", {"loss": -loss, "log p(x)": elbo, "log p(x|z)": likelihood})
        evaluator.update("Train", "likelihoods", {"loss": -loss, "log p(x)": elbo, "total log p(x|z_i)": likelihood})
        klds = {
            f"KL z{i+1}": kl
            for i, kl in enumerate([sd.loss.kl_samplewise for sd in stage_datas if sd.loss.kl_samplewise is not None])
        }
        klds["KL(q(z|x), p(z))"] = kl_divergences
        evaluator.update("Train", "divergences", klds)

    evaluator.update(
        "Train", "hyperparameters", {"free_nats": [free_nats], "beta": [beta], "learning_rate": [args.learning_rate]}
    )
    evaluator.report(epoch * len(datamodule.train_loader))
    evaluator.log(epoch)

    return beta


@torch.no_grad()
def test(epoch, dataloader, evaluator, dataset_name="test", max_test_examples=float("inf")):
    LOGGER.info(f"Testing: {dataset_name}")
    model.eval()

    x, _ = next(iter(dataloader))
    x = x.to(device)
    n = min(x.size(0), 8)
    likelihood_data, stage_datas, skip_likelihood = model(x, n_posterior_samples=args.test_samples)
    p_x_mean = likelihood_data.mean[: args.batch_size].view(args.batch_size, *in_shape)  # Reshape zeroth "sample"
    p_x_samples = likelihood_data.samples[: args.batch_size].view(args.batch_size, *in_shape)  # Reshape zeroth "sample"
    comparison = torch.cat([x[:n], p_x_mean[:n], p_x_samples[:n]])
    comparison = comparison.permute(0, 2, 3, 1)  # [B, H, W, C]
    fig, ax = plot_gallery(comparison.cpu().numpy(), ncols=n)
    fig.savefig(os.path.join(args.save_dir, f"reconstructions_{dataset_name}_{epoch:03}"))
    plt.close()

    decode_from_p_combinations = [[True] * n_p + [False] * (model.n_latents - n_p) for n_p in range(model.n_latents)]
    for decode_from_p in tqdm(decode_from_p_combinations, leave=False):
        n_skipped_latents = sum(decode_from_p)

        if max_test_examples != float("inf"):
            iterator = tqdm(
                zip(range(max_test_examples // dataloader.batch_size), dataloader),
                smoothing=0.9,
                total=max_test_examples // dataloader.batch_size,
                leave=False,
            )
        else:
            iterator = tqdm(enumerate(dataloader), smoothing=0.9, total=len(dataloader), leave=False)

        for _, (x, _) in iterator:
            x = x.to(device)

            likelihood_data, stage_datas, skip_recon_likelihood = model(
                x, n_posterior_samples=args.test_samples, decode_from_p=decode_from_p, use_mode=decode_from_p
            )
            kl_divergences = [
                stage_data.loss.kl_elementwise
                for stage_data in stage_datas
                if stage_data.loss.kl_elementwise is not None
            ]
            loss, elbo, likelihood, kl_divergences = criterion(
                likelihood_data.likelihood,
                kl_divergences,
                samples=args.test_samples,
                free_nats=0,
                beta=1,
                sample_reduction=args.test_sample_reduction,
                batch_reduction=None,
            )

            if n_skipped_latents == 0:  # Regular ELBO
                evaluator.update(dataset_name, "elbo", {"log p(x)": elbo})
                evaluator.update(
                    dataset_name, "likelihoods", {"loss": -loss, "log p(x)": elbo, "log p(x|z)": likelihood}
                )
                klds = {
                    f"KL z{i+1}": kl
                    for i, kl in enumerate(
                        [sd.loss.kl_samplewise for sd in stage_datas if sd.loss.kl_samplewise is not None]
                    )
                }
                klds["KL(q(z|x), p(z))"] = kl_divergences
                evaluator.update(dataset_name, "divergences", klds)

            evaluator.update(dataset_name, f"skip-elbo", {f"{n_skipped_latents} log p(x)": elbo})
            evaluator.update(dataset_name, f"skip-elbo-{dataset_name}", {f"{n_skipped_latents} log p(x)": elbo})
            evaluator.update(
                dataset_name,
                f"skip-likelihoods-{dataset_name}",
                {
                    f"{n_skipped_latents} loss": -loss,
                    f"{n_skipped_latents} log p(x)": elbo,
                    f"{n_skipped_latents} log p(x|z)": likelihood,
                },
            )
            klds = {
                f"{n_skipped_latents} KL z{i+1}": kl
                for i, kl in enumerate(
                    [sd.loss.kl_samplewise for sd in stage_datas if sd.loss.kl_samplewise is not None]
                )
            }
            klds[f"{n_skipped_latents} KL(q(z|x), p(z))"] = kl_divergences
            evaluator.update(dataset_name, f"skip-divergences-{dataset_name}", klds)


def collapse_multiclass_to_binary(y_true, zero_label=None):
    # Force the class index in zero_label to be zero and the others to collapse to 1
    zero_label_indices = y_true == zero_label
    y_true[zero_label_indices] = 0
    y_true[~zero_label_indices] = 1
    return y_true


def compute_roc_auc(y_true=None, y_score=None, zero_label=None):
    """Compares class zero_label to all other classes in y_true"""
    y_true = collapse_multiclass_to_binary(y_true, zero_label)
    fpr, tpr, thresholds = sklearn.metrics.roc_curve(y_true, y_score)
    roc_auc = sklearn.metrics.roc_auc_score(y_true, y_score, average="macro")
    return roc_auc, fpr, tpr, thresholds


def compute_pr_auc(y_true=None, y_score=None, zero_label=None):
    """Compares class zero_label to all other classes in y_true"""
    y_true = collapse_multiclass_to_binary(y_true, zero_label)
    precision, recall, thresholds = sklearn.metrics.precision_recall_curve(y_true, y_score)
    pr_auc = sklearn.metrics.average_precision_score(y_true, y_score, average="macro")
    return pr_auc, precision, recall, thresholds


def compute_roc_pr_metrics(y_true, y_score, classes, reference_class):
    """Compute the ROC and PR metrics from a primary dataset class to a number of other dataset classes"""
    roc_results = {}
    pr_results = {}
    for class_label in sorted(set(y_true) - set([reference_class])):
        idx = np.logical_or(y_true == reference_class, y_true == class_label)  # Compare primary to the other dataset

        roc_auc, fpr, tpr, thresholds = compute_roc_auc(
            y_true=y_true[idx], y_score=y_score[idx], zero_label=reference_class
        )

        pr_auc, precision, recall, thresholds = compute_pr_auc(
            y_true=y_true[idx], y_score=y_score[idx], zero_label=reference_class
        )

        idx_where_tpr_is_eighty = np.where((tpr - 0.8 >= 0))[0][0]
        fpr80 = fpr[idx_where_tpr_is_eighty]

        ood_target = [source for source, label in classes.items() if label == class_label][0]
        roc_results[ood_target] = dict(roc_auc=roc_auc, fpr=fpr, tpr=tpr, fpr80=fpr80, thresholds=thresholds)
        pr_results[ood_target] = dict(pr_auc=pr_auc, precision=precision, recall=recall, thresholds=thresholds)

    return roc_results, pr_results, fpr80


def subsample_labels_and_scores(y_true, y_score, n_examples):
    """Subsample y_true and y_score to have n_examples while maintaining their relative ordering"""
    assert len(y_true) == len(y_score) >= n_examples, f"Got {len(y_true)}, {len(y_score)}, {n_examples}"
    indices = [np.random.choice(np.where(y_true == i)[0], n_examples, replace=False) for i in set(y_true)]
    y_true = np.concatenate([y_true[idx] for idx in indices])
    y_score = np.concatenate([y_score[idx] for idx in indices])
    return y_true, y_score


if __name__ == "__main__":
    # Data
    datamodule = oodd.datasets.DataModule(
        batch_size=args.batch_size,
        test_batch_size=250,
        data_workers=args.data_workers,
        train_datasets=args.train_datasets,
        val_datasets=args.val_datasets,
        test_datasets=args.test_datasets,
    )
    args.save_dir = os.path.join(args.save_dir, list(datamodule.train_datasets.keys())[0] + "-"+args.model+'-'+args.augment+'-' + args.start_time)
    os.makedirs(args.save_dir, exist_ok=True)

    fh = logging.FileHandler(os.path.join(args.save_dir, "dvae.log"))
    fh.setLevel(logging.INFO)
    LOGGER.addHandler(fh)

    in_shape = datamodule.train_dataset.datasets[0].size[0]
    datamodule.save(args.save_dir)

    # Model
    model = getattr(oodd.models.dvae, args.model)
    model_argparser = model.get_argparser()
    model_args, unknown_model_args = model_argparser.parse_known_args()
    model_args.input_shape = in_shape

    model_args.config_deterministic = args.config_deterministic
    model_args.config_stochastic = args.config_stochastic
    model_args.likelihood_module = likelihood

    model = model(**vars(model_args)).to(device)

    p_z_samples = model.prior.sample(torch.Size([args.n_eval_samples])).to(device)
    sample_latents = [None] * (model.n_latents - 1) + [p_z_samples]

    # Optimization
    optimizer = torch.optim.Adam(model.parameters(), lr=args.learning_rate)

    criterion = oodd.losses.ELBO()

    deterministic_warmup = oodd.variational.DeterministicWarmup(n=args.warmup_epochs)
    free_nats_cooldown = oodd.variational.FreeNatsCooldown(
        constant_epochs=args.free_nats_epochs // 2,
        cooldown_epochs=args.free_nats_epochs // 2,
        start_val=args.free_nats,
        end_val=0,
    )

    # Logging
    LOGGER.info("Experiment config:")
    LOGGER.info(args)
    rich.print(vars(args))
    LOGGER.info("%s", deterministic_warmup)
    LOGGER.info("%s", free_nats_cooldown)
    LOGGER.info("DataModule:\n%s", datamodule)
    LOGGER.info("Model:\n%s", model)

    if args.use_wandb:
        wandb.init(project="hvae-oodd", config=args, name=f"{args.model} {datamodule.primary_val_name} {args.name}")
        wandb.save("*.pt")
        wandb.watch(model, log="all")

    # Run
    test_elbos = [-np.inf]
    test_evaluator = Evaluator(primary_source=datamodule.primary_val_name, primary_metric="log p(x)", logger=LOGGER, use_wandb=args.use_wandb)

    LOGGER.info("Running training...")
    for epoch in range(1, args.epochs + 1):
        current_beta = train(epoch)

        if epoch % args.test_every == 0:
            # Sample
            with torch.no_grad():
                likelihood_data, stage_datas, skip_likelihood = model.sample_from_prior(
                    n_prior_samples=args.n_eval_samples, forced_latent=sample_latents
                )
                p_x_samples = likelihood_data.samples.view(args.n_eval_samples, *in_shape)
                p_x_mean = likelihood_data.mean.view(args.n_eval_samples, *in_shape)
                comparison = torch.cat([p_x_samples, p_x_mean])
                comparison = comparison.permute(0, 2, 3, 1)  # [B, H, W, C]
                fig, ax = plot_gallery(comparison.cpu().numpy(), ncols=args.n_eval_samples // 4)
                fig.savefig(os.path.join(args.save_dir, f"samples_{epoch:03}"))
                plt.close()

            # Test
            for name, dataloader in datamodule.val_loaders.items():
                test(epoch, dataloader=dataloader, evaluator=test_evaluator, dataset_name=name, max_test_examples=10000)

            # Save
            test_elbo = test_evaluator.get_primary_metric().mean().cpu().numpy()
            if np.max(test_elbos) < test_elbo:
                test_evaluator.save(args.save_dir, idx=epoch)
                model.save(args.save_dir, idx=f'{epoch}_beta_{current_beta}_seed_{args.seed}')
                LOGGER.info("Saved model!")
            test_elbos.append(test_elbo)

            # Compute LLR
            for source in test_evaluator.sources:
                for k in range(1, model.n_latents):
                    log_p_a = test_evaluator.metrics[source][f"skip-elbo"][f"0 log p(x)"]
                    log_p_b = test_evaluator.metrics[source][f"skip-elbo"][f"{k} log p(x)"]
                    llr = log_p_a - log_p_b
                    test_evaluator.update(source, series="LLR", metrics={f"LLR>{k}": llr})


            # Compute AUROC score for L>k and LLR>k metrics
            reference_dataset = datamodule.primary_val_name
            max_examples = min(
                [len(d) for d in datamodule.val_datasets.values()]
            )  # Maximum number of examples to use for equal sized sets

            # L >k
            for n_skipped_latents in range(model.n_latents):
                y_true, y_score, classes = test_evaluator.get_classes_and_scores_per_source(
                    f"skip-elbo", f"{n_skipped_latents} log p(x)"
                )
                y_true, y_score = subsample_labels_and_scores(y_true, y_score, max_examples)
                roc, pr, fpr80 = compute_roc_pr_metrics(
                    y_true, -y_score, classes, classes[reference_dataset]
                )  # Negation since higher score means more OOD
                for ood_target, value_dict in roc.items():
                    test_evaluator.update(
                        source=reference_dataset,
                        series=f"ROC AUC L>k",
                        metrics={f"ROC AUC L>{n_skipped_latents} {ood_target}": [value_dict["roc_auc"]]},
                    )
                    test_evaluator.update(
                        source=reference_dataset,
                        series=f"ROC AUC L>{n_skipped_latents}",
                        metrics={f"ROC AUC L>{n_skipped_latents} {ood_target}": [value_dict["roc_auc"]]},
                    )
                for ood_target, value_dict in pr.items():
                    test_evaluator.update(
                        source=reference_dataset,
                        series=f"PRC AUC L>k",
                        metrics={f"PRC AUC L>{n_skipped_latents} {ood_target}": [value_dict["pr_auc"]]},
                    )
                    test_evaluator.update(
                        source=reference_dataset,
                        series=f"PRC AUC L>{n_skipped_latents}",
                        metrics={f"PRC AUC L>{n_skipped_latents} {ood_target}": [value_dict["pr_auc"]]},
                    )

                    test_evaluator.update(
                        source=reference_dataset,
                        series=f"fpr80 L>k",
                        metrics={f"fpr80 L>{n_skipped_latents} {ood_target}": [fpr80]},
                    )
                    test_evaluator.update(
                        source=reference_dataset,
                        series=f"fpr80 L>{n_skipped_latents}",
                        metrics={f"fpr80 L>{n_skipped_latents} {ood_target}": [fpr80]},
                    )

            # LLR >0 >k
            for n_skipped_latents in range(1, model.n_latents):
                y_true, y_score, classes = test_evaluator.get_classes_and_scores_per_source(
                    f"LLR", f"LLR>{n_skipped_latents}"
                )
                y_true, y_score = subsample_labels_and_scores(y_true, y_score, max_examples)
                roc, pr, fpr80 = compute_roc_pr_metrics(y_true, y_score, classes, classes[reference_dataset])
                for ood_target, value_dict in roc.items():
                    test_evaluator.update(
                        source=reference_dataset,
                        series=f"ROC AUC LLR>k",
                        metrics={f"ROC AUC LLR>{n_skipped_latents} {ood_target}": [value_dict["roc_auc"]]},
                    )
                    test_evaluator.update(
                        source=reference_dataset,
                        series=f"ROC AUC LLR>{n_skipped_latents}",
                        metrics={f"ROC AUC LLR>{n_skipped_latents} {ood_target}": [value_dict["roc_auc"]]},
                    )

                for ood_target, value_dict in pr.items():
                    test_evaluator.update(
                        source=reference_dataset,
                        series=f"PRC AUC LLR>k",
                        metrics={f"PRC AUC LLR>{n_skipped_latents} {ood_target}": [value_dict["pr_auc"]]},
                    )
                    test_evaluator.update(
                        source=reference_dataset,
                        series=f"PRC AUC LLR>{n_skipped_latents}",
                        metrics={f"PRC AUC LLR>{n_skipped_latents} {ood_target}": [value_dict["pr_auc"]]},
                    )
                    test_evaluator.update(
                        source=reference_dataset,
                        series=f"fpr80 LLR>k",
                        metrics={f"fpr80 LLR>{n_skipped_latents} {ood_target}": [fpr80]},
                    )
                    test_evaluator.update(
                        source=reference_dataset,
                        series=f"fpr80 LLR>{n_skipped_latents}",
                        metrics={f"fpr80 LLR>{n_skipped_latents} {ood_target}": [fpr80]},
                    )


            # Report
            print(">>>>>>>>>>>" + args.save_dir + f'  kl_weigth:{current_beta} ' + "<<<<<<<<<<<<<")
            print(config_stochastic)
            test_evaluator.report(epoch * len(datamodule.train_loader))
            test_evaluator.log(epoch)
            test_evaluator.reset()
