# Supplementary material
Source: ML conference proceedings conference paper supplement (https://proceedings.neurips.cc/paper_files/paper/2022/hash/3066f60a91d652f4dc690637ac3a2f8c-Abstract.html)
Supplement: Supplementary file 1 [file 3066f60a91d652f4dc690637ac3a2f8c-Supplemental-Conference.zip › nips_hvae_Supplementary Material/nips22_hvae_ood_code/tests/datasets/test_datamodule.py]

import argparse
import sys
import unittest.mock

import pytest

from oodd.datasets import DataModule
from oodd.constants import TRAIN_SPLIT, VAL_SPLIT


def test_init_default():
    dm = DataModule(train_datasets=["MNISTBinarized"], val_datasets=["MNISTBinarized", "FashionMNISTBinarized"])

    assert len(dm.train_datasets) == 1
    assert len(dm.val_datasets) == 2
    assert len(dm.test_datasets) == 0
    assert len(dm.train_dataset.datasets) == 1

    assert dm.train_datasets["MNISTBinarized"].split == TRAIN_SPLIT
    assert dm.val_datasets["MNISTBinarized"].split == VAL_SPLIT
    assert dm.val_datasets["FashionMNISTBinarized"].split == VAL_SPLIT


def test_init_dataset_configs():
    dm = DataModule(
        train_datasets={"MNISTBinarized": {"dynamic": True}},
        val_datasets={"MNISTBinarized": {"dynamic": False}, "FashionMNISTBinarized": {"dynamic": False}},
        batch_size=64,
        data_workers=2,
    )

    assert dm.train_datasets["MNISTBinarized"].dynamic == True
    assert dm.val_datasets["MNISTBinarized"].dynamic == False
    assert dm.val_datasets["FashionMNISTBinarized"].dynamic == False

    assert dm.val_loaders["FashionMNISTBinarized"].batch_size == 64 * dm.test_batch_size_factor
    assert dm.val_loaders["FashionMNISTBinarized"].num_workers == 2

    assert dm.val_loaders["MNISTBinarized"].batch_size == 64 * dm.test_batch_size_factor
    assert dm.val_loaders["MNISTBinarized"].num_workers == 2


def test_init_cli_args():
    """Test dataset_configs argument takes precedence over CLI arguments for individual datasets"""
    # Minor pre-test that the sys.argv context manager works as expected
    parser = argparse.ArgumentParser()
    parser.add_argument("--test_argument", type=int)

    test_args = ["--test_argument", "5"]
    with unittest.mock.patch("sys.argv", ["program_name", *test_args]):
        args, unknown = parser.parse_known_args()

    assert args.test_argument == 5

    # Test that CLI arguments are passed to all datasets that have that argument
    test_args = [
        "--dynamic",
        "True",
    ]
    with unittest.mock.patch("sys.argv", ["program_name", *test_args]):
        dm = DataModule(
            train_datasets=["MNISTBinarized"],
            val_datasets=["MNISTBinarized", "FashionMNISTBinarized"],
        )
    assert dm.train_datasets["MNISTBinarized"].dynamic == True
    assert dm.val_datasets["MNISTBinarized"].dynamic == True
    assert dm.val_datasets["FashionMNISTBinarized"].dynamic == True

    # Test that CLI arguments are preceeded by kwargs
    with unittest.mock.patch("sys.argv", "program_name", *test_args):
        dm = DataModule(
            train_datasets={"MNISTBinarized": {"dynamic": True}},
            val_datasets=["MNISTBinarized"],
        )

    assert dm.train_datasets["MNISTBinarized"].dynamic == True
    assert dm.val_datasets["MNISTBinarized"].dynamic == False  # default


def test_batch_size():
    dm = DataModule(train_datasets=["MNISTBinarized"], val_datasets=["MNISTBinarized"], batch_size=64)

    dm.batch_size = 256

    assert dm.train_loader.batch_size == 256
    assert dm.val_loaders["MNISTBinarized"].batch_size == 64 * dm.test_batch_size_factor

    dm.test_batch_size = 1024

    assert dm.train_loader.batch_size == 256
    assert dm.val_loaders["MNISTBinarized"].batch_size == 1024
