# Supplementary material
Source: ML conference proceedings conference paper supplement (https://proceedings.neurips.cc/paper_files/paper/2022/hash/3066f60a91d652f4dc690637ac3a2f8c-Abstract.html)
Supplement: Supplementary file 1 [file 3066f60a91d652f4dc690637ac3a2f8c-Supplemental-Conference.zip › nips_hvae_Supplementary Material/nips22_hvae_ood_code/tests/layers/test_stochastic.py]

import pytest

import torch

from oodd.layers.stochastic import GaussianStochasticModule, GaussianDense, GaussianConv2d


def test_gaussian_stochastic_module_prior_is_standard_normal():
    gauss = GaussianStochasticModule(
        in_shape=128,
        latent_features=64,
        top=True
    )
    
    assert not hasattr(gauss, 'prior_logits')

    gauss.define_prior(64)

    assert hasattr(gauss, 'prior_logits')
    
    assert (gauss.prior.mean == torch.zeros_like(gauss.prior.mean)).all()
    assert (gauss.prior.stddev == torch.ones_like(gauss.prior.stddev)).all()
